# Supplementary material for: Boninite and boninite-series volcanics in northern Zambales ophiolite: doubly vergent subduction initiation along Philippine Sea plate margins
Source: Copernicus journal article supplement (doi:10.5194/se-9-713-2018), 2018-06-05
Supplement: Supplementary file 1 [file se-9-713-2018-supplement.zip]

Archive with 6 entries (6 files):
- Supp Table 1 final_mineral chem.xlsx
- SuppFig2.jpg
- se-9-713-2018-supplement-title-page.pdf
- SuppFig1.png
- Supp Table 2 final_WR chem.xlsx
- Supplementary Figure captions.pdf
