# Supplementary material for: Boninite and boninite-series volcanics in northern Zambales ophiolite: doubly vergent subduction initiation along Philippine Sea plate margins
Source: Copernicus journal article supplement (doi:10.5194/se-9-713-2018), 2018-06-05
Supplement: Supplementary file 1 [file se-9-713-2018-supplement.zip › se-9-713-2018-supplement-title-page.pdf]

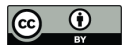

## *Supplement of*

# **Boninite and boninite-series volcanics in northern Zambales ophiolite: doubly vergent subduction initiation along Philippine Sea plate margins**

**Americus Perez et al.**

*Correspondence to:* Americus Perez ([americus.perez@gmail.com](mailto:americus.perez@gmail.com), [adperez@stu.kanazawa-u.ac.jp](mailto:adperez@stu.kanazawa-u.ac.jp))

- [se-9-713-2018-supplement-title-page.pdf](#)
- [Supp Table 1 final\\_mineral chem.xlsx](#)
- [Supp Table 2 final\\_WR chem.xlsx](#)
- [SuppFig1.png](#)
- [SuppFig2.jpg](#)
- [Supplementary Figure captions.pdf](#)

The copyright of individual parts of the supplement might differ from the CC BY 4.0 License.
