# Supplementary material for: Boninite and boninite-series volcanics in northern Zambales ophiolite: doubly vergent subduction initiation along Philippine Sea plate margins
Source: Copernicus journal article supplement (doi:10.5194/se-9-713-2018), 2018-06-05
Supplement: Supplementary file 1 [file se-9-713-2018-supplement.zip › Supp Table 2 final_WR chem.xlsx]

## Sheet: Table_final
Table 2 Whole rock compositions of boninite and boninite-series volcanics from northern Zambales ophiolite
Sample	B-5-7	B-5-8	B-6-9	B-6-10	B-7-11	ZM2-100B	ZM2-100A	ZM2-107	B-99D	B-99C	B-100	B-82	B-89	B-90-1	B-54f	ZM2-128A	ZM2-128C	B-1-1	B-1-3	B-1-4	B-72	ZM2-96-2A	B-2-5	ZM2-105A	ZM2-105D	B-102	ZM2-141	ZM2-96-2B	ZM2-116	ZM2-148	B-79	B-28	B-92-2B	B-102-1	ZM2-124	ZM2-136	B-91-1	ZM2-123	ZM2-125	ZM2-135	B-47 d1	B-47 d3	B-47 d7	B-47 d4		JB-2	JB-21, RV	JB-3	JB-32, RV
																																														N=2
Longitude	119.938	119.938	119.938	119.938	119.939	119.939	119.939	119.94	119.937	119.937	119.937	119.952	119.95	119.95	119.95	119.945	119.945	119.939	119.939	119.939	119.938	119.94	119.939	119.941	119.941	119.933	119.95	119.94	119.932	119.944	119.94	119.942	119.95	119.933	119.933	119.949	119.95	119.933	119.934	119.949	119.962	119.962	119.962	119.962
Latitude	15.9904	15.9904	15.9903	15.9903	15.9904	15.991	15.991	15.9928	15.984	15.984	15.9834	15.9695	15.9725	15.973	15.9582	15.9842	15.9842	15.99	15.99	15.99	15.9745	15.9906	15.9898	15.993	15.993	15.9824	15.98	15.9906	15.9763	15.9778	15.9767	15.9646	15.978	15.9824	15.968	15.9798	15.9782	15.967	15.9688	15.9797	15.963	15.963	15.963	15.963
Unit	UV	UV	UV	UV	UV	UV	UV	UV	UV	UV	UV	DC	DC	DC	UV	UV	UV	LV	LV	LV	LV	LV	LV	LV	LV	LV	LV	LV	LV	LV	LV	LV	LV	LV	LV	LV	LV	LV	LV	LV	DC	DC	DC	DC
Occurrence	pillow lava	lapili tuff	vesicular pillow lava	pillow lava, glassy margin	pillow lava outer margin and glassy crust	pillow lava	pillow lava	tuff breccia	pillow lava	pillow lava	massive flow	dike	dike	dike	pillow lava margin, float	pillow lava	pillow lava	glassy pillow lava core	glassy pillow lava	glassy pillow lava	pillow lava	glassy pillow lava margin	glassy dike margin	glassy pillow lava margin	glassy pillow lava margin	glassy pillow lava margin	tuff breccia glassy matrix	hyaloclastite glassy matrix	pillow lava	tuff breccia	lapili tuff	lapili tuff (overlain by tuff breccia and sheet flow)	lapili tuff	lapili tuff (overlying pillow lavas)	lapili tuff	lapili tuff (overlying pahoehoe flow)	lapili tuff	lapili tuff	lapili tuff	lapili tuff (adjacent to spatter and scoria deposit)	dike	dike	dike, vent breccia wallrock	dike
SiO2 (wt%)	57.0747	56.6626	57.2877	56.993	56.9343	57.2309	58.066	54.8341	55.54	53.33	55.0342	54.48	53.77	54.26	51.2171	49.89	49.4	62.46	62.99	62.18	57.79	56.18	62.1	56.7253	55.75	56.31	56.83	56.84	54.54	56.76	57.15	57.69	59.42	57.14	57.08	57.02	59.66	57.08	56.78	56.46	58.89	59.85	59.88	53.18		53.26	53.25
TiO2	0.24983	0.248834	0.255802	0.250825	0.245848	0.248834	0.250825	0.227932	0.36	0.28	0.427	0.32	0.35	0.33	0.32448	0.24	0.24	0.44	0.45	0.45	0.37	0.44	0.44	0.325475	0.44	0.34	0.32	0.43	0.3	0.34	0.34	0.39	0.43	0.32	0.35	0.33	0.43	0.33	0.33	0.33	0.47	0.47	0.39	0.6		1.17	1.19
Al2O3	13.244	13.3077	13.4281	13.5366	13.0459	13.2897	13.3724	13.246	13.87	12.94	14.4264	16.52	15.16	14.05	13.9278	13.3	15.12	14.5	14.5	14.4	16.51	15.94	14.36	15.8955	16.04	16.33	17.17	15.91	16.31	17.25	16.26	17.15	16.05	16.28	17.04	17	15.93	16.5	16.32	17.15	15.98	15.08	15.08	18.01		14.68	14.64
Fe2O3	8.72314	8.72513	8.91026	9.10834	9.32432	8.85452	8.7112	9.2865	9.9	9.67	9.73042	10.12	10.69	9.16	10.2828	11.33	9.81	10.2	9.86	10.41	9.79	11.28	10.52	9.80109	11.47	10.33	9.17	10.91	8.95	9.03	9.39	10.25	10.08	9.24	9.43	9.1	10.04	9.38	9.54	9.12	8.68	8.41	10.12	10.65		14.3	14.25
MnO	0.142333	0.145319	0.146315	0.150296	0.149301	0.149301	0.16224	0.144324	0.15	0.15	0.149301	0.19	0.24	0.21	0.175179	0.28	0.26	0.15	0.14	0.15	0.16	0.17	0.14	0.145319	0.17	0.15	0.15	0.17	0.13	0.15	0.14	0.18	0.16	0.14	0.13	0.16	0.15	0.16	0.15	0.2	0.21	0.17	0.15	0.2		0.22	0.218
MgO	8.91325	8.55891	8.51312	8.41359	8.99885	8.89533	8.97795	12.2755	9.62	12.83	8.33894	8.63	9.65	12.31	12.1969	13.43	12.74	2.38	2.48	2.43	5.08	4.92	2.54	5.45843	5.44	4.84	5.89	5.32	6.93	6.09	5.51	5	3.77	5.51	5.54	5.96	3.87	5.55	5.67	5.89	4.99	5.25	6.02	6.16		4.55	4.62
CaO	9.40594	9.34124	9.50846	9.56918	9.15113	9.27655	8.98093	8.48625	8.78	9.78	9.36712	7.7	8.77	7.34	10.03	9.61	10.78	7.29	7.16	7.25	8.71	9.68	7.15	9.83991	9.32	10.01	8.8	9.04	9.44	8.37	9.4	8.2	7.99	9.7	8.59	8.74	7.92	9.42	9.37	8.99	9.56	9.48	7.37	9.25		9.78	9.82
Na2O	1.32579	1.29693	1.35465	1.44921	1.28199	1.37257	1.28199	0.810205	1.4	0.72	2.19671	1.89	1.28	1.57	1.30986	0.13	0.38	2.32	2.13	2.28	1.34	1.57	2.19	1.64529	1.39	1.66	1.12	1.41	1.53	1.02	1.32	1.18	1.73	1.57	1.07	1.15	1.69	1.39	1.4	1.21	1.6	1.63	1.41	2.21		2.03	2.04
K2O	0.285662	0.346378	0.342396	0.282676	0.332443	0.332443	0.307559	0.438944	0.32	0.25	0.225942	0.26	0.14	0.32	0.183142	1.7	0.89	0.45	0.49	0.56	0.52	0.25	0.65	0.262769	0.34	0.28	0.74	0.26	0.89	1.05	0.71	0.71	0.65	0.26	0.8	0.77	0.69	0.56	0.56	0.71	0.11	0.16	0.12	0.09		0.42	0.42
P2O5	0.0199068	0.0228928	0.0209021	0.0238881	0.0228928	0.0218974	0.0199068	0.0129394	0.02	0.02	0.0298601	0.02	0.02	0.02	0.0209021	0.02	0.01	0.04	0.04	0.04	0.02	0.03	0.04	0.0228928	0.02	0.03	0.02	0.03	0.02	0.02	0.02	0.03	0.03	0.03	0.02	0.02	0.03	0.02	0.02	0.02	0.03	0.03	0.03	0.04		0.09	0.101
Total	99.3845	98.6559	99.7677	99.7776	99.487	99.6721	100.131	99.7627	99.96	99.97	99.9259	100.13	100.07	99.57	99.6681	99.93	99.63	100.23	100.24	100.15	100.29	100.46	100.13	100.122	100.38	100.28	100.21	100.32	99.04	100.08	100.24	100.78	100.31	100.19	100.05	100.25	100.41	100.39	100.14	100.08	100.52	100.53	100.57	100.39
LOI	3.72689	3.85792	3.76376	1.83971	4.09024	4.05715	4.32063	7.02227	2.93171	4.11979	2.6571	4.44574	3.69186	4.43972	5.65695	9.60037	8.51714	3.52469	4.68061	3.4801	7.17962	2.35746	3.84518	3.33196	4.85898	1.98236	8.22755	4.50079	3.23724	9.61326	6.613	9.25017	6.52445	3.51634	9.5518	8.85129	6.6871	6.14005	6.06294	8.0124	1.57661	1.17783	2.46618	1.85282
TAS classification	And	And	And	And	And	And	And	Bas And	Bas And	Bas And	Bas And	Bas And	Bas And	Bas And	Bas	Bas	Bas	And	Dac	And	And	Bas And	And	And	Bas And	Bas And	And	And	Bas And	And	And	And	And	And	And	And	And	And	And	Bas And	And	And	And	Bas And
High-Mg classification	BON, HSB	BON, HSB	BON, HSB	BON, HSB	BON, HSB	BON, HSB	BON, HSB	BON, LSB	BON, LSB	BON, LSB	BON, LSB	BON, LSB	BON, LSB	BON, LSB	Bon. Bas	Bon. Bas	Bon. Bas	LSB-series	LSB-series	LSB-series	LSB-series	LSB-series	LSB-series	LSB-series	LSB-series	LSB-series	LSB-series	LSB-series	LSB-series	LSB-series	LSB-series	LSB-series	LSB-series	LSB-series	LSB-series	LSB-series	LSB-series	LSB-series	LSB-series	LSB-series	LSB-series	LSB-series	LSB-series	TH Bas. Andesite dike
SiO2 (wt%)	57.9376	57.948	57.9395	57.6473	57.7704	57.9348	58.5	55.482	56.1191	53.868	55.6176	54.9658	54.3137	55.0013	51.9243	50.4986	50.0775	62.9586	63.4646	62.7402	58.192	56.559	62.6791	57.2173	56.1821	56.7383	57.2356	57.2828	55.5718	57.232	57.5533	57.8328	59.8388	57.5635	57.5953	57.3998	60.0176	57.3955	57.247	56.9347	59.0966	60.0377	60.147	53.5425
TiO2	0.253607	0.254479	0.258712	0.253704	0.249459	0.251895	0.2527	0.230625	0.363753	0.282825	0.431526	0.322854	0.353539	0.334508	0.328961	0.242928	0.243291	0.443512	0.453391	0.454055	0.372574	0.442968	0.444103	0.328299	0.443411	0.342586	0.322284	0.43335	0.305675	0.342827	0.342399	0.390965	0.433031	0.322372	0.35316	0.332198	0.432578	0.331824	0.332714	0.332774	0.471649	0.471474	0.391739	0.60409
Al2O3	13.4442	13.6096	13.5809	13.692	13.2375	13.4532	13.4723	13.4025	14.0146	13.0706	14.5794	16.6673	15.3133	14.2419	14.1201	13.4622	15.3274	14.6157	14.6093	14.5297	16.6249	16.0475	14.4939	16.0334	16.1643	16.4542	17.2926	16.034	16.6186	17.3934	16.3747	17.1925	16.1631	16.4007	17.1938	17.1132	16.0255	16.5912	16.4542	17.2942	16.0361	15.1273	15.1472	18.1328
FeO*	7.96787	8.02908	8.10879	8.28987	8.51334	8.0654	7.89702	8.45483	9.00102	8.78897	8.84837	9.18731	9.71625	8.35488	9.38039	10.3192	8.94821	9.25135	8.939	9.45144	8.87044	10.2184	9.5543	8.89564	10.4008	9.36577	8.31017	9.89343	8.20567	8.19287	8.50886	9.24591	9.13403	8.37589	8.56184	8.24283	9.08827	8.4869	8.65481	8.27528	7.83777	7.59115	9.1467	9.64832
MnO	0.144485	0.148616	0.147979	0.152021	0.151493	0.151137	0.163453	0.146029	0.151564	0.151513	0.150883	0.191694	0.242427	0.212869	0.177598	0.283416	0.263566	0.151197	0.141055	0.151352	0.161113	0.171147	0.141306	0.14658	0.171318	0.151141	0.151071	0.171324	0.132459	0.151247	0.140988	0.180446	0.161128	0.141038	0.131174	0.161066	0.150899	0.160884	0.151234	0.201681	0.210737	0.170533	0.150669	0.201363
MgO	9.04802	8.75308	8.60999	8.51017	9.13099	9.00474	9.04504	12.4205	9.7203	12.9594	8.42734	8.70696	9.74757	12.4782	12.3653	13.5938	12.9147	2.399	2.49869	2.45189	5.11534	4.95319	2.56369	5.50578	5.48217	4.87682	5.93204	5.36145	7.0611	6.14064	5.54888	5.01238	3.79657	5.55084	5.59002	5.9997	3.8932	5.58068	5.71664	5.93952	5.00751	5.26646	6.04684	6.20199
CaO	9.54816	9.55316	9.61665	9.67903	9.28551	9.39064	9.04805	8.58651	8.87154	9.87867	9.46642	7.76867	8.85868	7.44027	10.1685	9.72723	10.9278	7.34819	7.21395	7.31532	8.77059	9.74531	7.21668	9.92526	9.39224	10.0861	8.86281	9.11043	9.61859	8.4396	9.46634	8.2203	8.04632	9.7719	8.66755	8.79822	7.96748	9.47207	9.44707	9.06558	9.59354	9.50973	7.40286	9.31305
Na2O	1.34584	1.32635	1.37007	1.46585	1.30082	1.38945	1.29158	0.819777	1.4146	0.727264	2.22	1.90685	1.29294	1.59145	1.32795	0.131586	0.385211	2.33852	2.14605	2.30054	1.34932	1.58059	2.21042	1.65956	1.40077	1.67263	1.12799	1.42098	1.55894	1.02848	1.32932	1.18292	1.74219	1.58164	1.07966	1.15766	1.70013	1.39768	1.41152	1.22017	1.60561	1.63511	1.41629	2.22506
K2O	0.289981	0.354235	0.346292	0.285921	0.337325	0.336532	0.309858	0.44413	0.323336	0.252522	0.228337	0.262319	0.141416	0.324372	0.185671	1.72074	0.902205	0.453592	0.493692	0.565046	0.523617	0.251687	0.656062	0.265048	0.342635	0.28213	0.745282	0.262026	0.906837	1.05873	0.715011	0.711758	0.654581	0.261927	0.807223	0.775129	0.694136	0.563096	0.564606	0.715969	0.110386	0.160502	0.120535	0.0906135
P2O5	0.0202077	0.0234121	0.0211399	0.0241623	0.0232289	0.0221668	0.0200555	0.0130923	0.0202085	0.0202018	0.0301767	0.0201784	0.0202022	0.0202732	0.0211907	0.020244	0.0101371	0.0403193	0.0403014	0.0403604	0.0201391	0.0302024	0.040373	0.0230913	0.020155	0.0302282	0.0201428	0.0302337	0.0203784	0.0201663	0.0201411	0.0300743	0.0302114	0.0302224	0.0201806	0.0201332	0.0301798	0.0201106	0.0201645	0.0201681	0.0301053	0.0300941	0.0301338	0.0402726
Total	100	100	100	100	100	100	100	100	100	100	100	100	100	100	100	100	100	100	100	100	100	100	100	100	100	100	100	100	100	100	100	100	100	100	100	100	100	100	100	100	100	100	100	100
LOI	3.72689	3.85792	3.76376	1.83971	4.09024	4.05715	4.32063	7.02227	2.93171	4.11979	2.6571	4.44574	3.69186	4.43972	5.65695	9.60037	8.51714	3.52469	4.68061	3.4801	7.17962	2.35746	3.84518	3.33196	4.85898	1.98236	8.22755	4.50079	3.23724	9.61326	6.613	9.25017	6.52445	3.51634	9.5518	8.85129	6.6871	6.14005	6.06294	8.0124	1.57661	1.17783	2.46618	1.85282
Mg#	0.669338	0.660248	0.65431	0.646638	0.656583	0.665573	0.671239	0.723657	0.658124	0.7244	0.629323	0.628168	0.641363	0.726949	0.701476	0.701337	0.720104	0.316121	0.332568	0.31621	0.506895	0.463543	0.323555	0.524556	0.484424	0.481383	0.559948	0.491358	0.605358	0.57193	0.537567	0.491449	0.425595	0.541568	0.53786	0.564742	0.432983	0.53963	0.540742	0.561295	0.532466	0.552911	0.54096	0.533985
																																														N=3		N=3
Rb (μg/g)	7.5648	8.44446	8.1558	7.63326	8.1892	7.87232	7.58266	8.31639	2.74698	1.98201	1.50727	1.46955		2.73042	2.50331	27.4226	17.775	9.09033	9.81297	9.47425	8.38903	5.93999	11.108	5.06507	6.60232	5.65258	9.67292	6.1447	5.11211	13.903	8.09156	12.4772	9.55335	5.9593	10.1675	10.5376	11.0439	8.00634	7.86028	10.3933	0.808181	0.866995		0.687999		6.5	6.4	14.6	14.3
Sr	61.742	68.7006	69.7243	63.2774	71.3146	63.2634	62.6173	68.5562	69.828	42.4661	105.986	57.6718		82.7171	64.3014	51.7556	34.683	107.503	111.221	111.286	111.552	79.3912	109.426	101.096	64.5188	104.897	127.865	82.2765	82.8388	128.561	112.075	104.374	108.485	106.57	84.8891	124.566	111.702	103.646	127.484	153.719	93.1433	65.3368		103.489		178.4	178.2	403	414
Y	13.1967	11.9525	11.6175	11.8424	12.3102	12.1625	11.8884	10.4424	17.0306	13.5166	13.8696	12.3241		11.6553	21.8043	6.24967	6.08035	19.1352	19.0753	19.2297	15.3962	14.6207	18.9887	12.3068	13.8173	12.363	11.4004	14.2959	19.4276	11.5364	12.8057	13.6685	15.4634	11.9202	11.9806	11.0121	15.1216	11.8822	12.2246	11.7916	14.8853	15.7154		15.7158		25.61	23.56	27.7	24.7
Zr	15.1914	15.5432	15.2904	15.6795	15.1311	15.8269	15.6381	12.5494	15.4991	13.9744	17.9344	13.1082		14.9282	13.3818	10.3581	10.5619	29.4166	29.6293	30.143	20.515	17.3145	29.5416	18.6167	17.0743	18.7101	18.3708	17.0715	10.4316	18.8774	18.5395	21.3563	25.9933	18.5639	19.1585	18.391	25.7584	18.3844	18.7123	18.7488	19.7756	18.0186		19.8298		47.35	48.25	95	100
Nb	0.304528	0.326179	0.317868	0.353976	0.33035	0.29458	0.304239	0.250319	0.36199	0.279446	0.167481	0.198119		0.166245	0.167748	0.205997	0.216489	0.423926	0.449137	0.433392	0.281031	0.342953	0.447961	0.286829	0.300856	0.32548	0.248336	0.285313	0.210887	0.240433	0.292236	0.30241	0.387355	0.296951	0.248349	0.250086	0.346996	0.265499	0.277546	0.249476	0.31248	0.34615		0.250296		0.518	0.565	2.13	2.47
Cs	0.674385	0.736615	0.73954	0.726695	0.720659	0.73926	0.677291	0.446792	0.0251487	0.0241249	0.0246853	0.045588		0.019464	0.36838	0.136851	0.0564149	0.72468	0.753343	0.74306	0.404788	0.603201	0.721026	0.40391	0.560162	0.457641	0.280532	0.577491	0.0970644	0.299225	0.323931	0.681163	0.453287	0.436391	0.250067	0.286068	0.616434	0.357489	0.322831	0.319058	0.0100086	0.0121848		0.00855982		0.8	0.8	0.9	0.87
Ba	26.6121	30.8773	29.789	28.926	26.8951	27.3116	29.0224	17.6943	29.8486	16.6386	21.2806	10.2578		99.2439	32.3086	49.2861	28.6895	41.7943	42.6744	41.6175	23.5837	28.7816	39.7438	24.721	19.7925	25.2775	18.2915	26.9629	35.7841	27.1498	19.8287	53.866	27.184	24.4933	15.2799	43.6344	27.8957	24.6771	20.1843	40.3571	4.68942	7.26746		7.2208		216.8	218.1	234	234
La	0.577073	0.610359	0.611853	0.636432	0.618109	0.625017	0.604819	0.568937	0.759764	0.579925	0.528524	0.349212		0.436739	0.584765	0.267168	0.181273	1.05425	1.0835	1.07601	0.75714	0.578315	1.05593	0.641408	0.527223	0.693886	0.690224	0.554596	0.725736	0.61271	0.678855	0.678643	0.953261	0.638237	0.681923	0.660533	0.970151	0.635067	0.644018	0.684535	0.641237	0.681817		0.753563		2.233	2.281	8.3	8.3
Ce	1.33436	1.4307	1.46071	1.47597	1.39878	1.47985	1.45896	1.16487	1.48563	1.30126	1.56501	1.02404		1.22408	1.1022	0.688585	0.627489	2.61798	2.61622	2.64099	1.6894	1.4728	2.55622	1.59704	1.30896	1.70852	1.65211	1.37594	1.49194	1.59538	1.61044	1.80467	2.3048	1.5497	1.68609	1.65589	2.36703	1.60995	1.60031	1.69539	1.73326	1.60553		2.21201		6.515	6.552	21.1	20.8
Pr	0.218059	0.224712	0.226555	0.226796	0.215252	0.223908	0.224576	0.196235	0.250245	0.207576	0.282474	0.181996		0.219718	0.273541	0.0957964	0.0728461	0.395828	0.403639	0.410883	0.283528	0.243253	0.396676	0.244414	0.221493	0.267129	0.247409	0.225338	0.243007	0.238278	0.262346	0.280028	0.345809	0.240768	0.259874	0.249323	0.359621	0.257121	0.250102	0.26018	0.278974	0.247337		0.394328		1.098	1.129	3.07	3.25
Nd	1.19158	1.24543	1.28701	1.26138	1.18862	1.29494	1.22147	1.10298	1.46825	1.23312	1.81144	1.19021		1.36874	1.74891	0.560357	0.462784	2.32271	2.31682	2.28711	1.6578	1.42095	2.21646	1.44689	1.30808	1.48504	1.41979	1.37723	1.52492	1.39125	1.50914	1.6323	1.97156	1.43573	1.42999	1.34502	1.92341	1.47171	1.4486	1.4768	1.71832	1.48872		2.48473		6.233	6.392	15.4	15.1
Sm	0.532362	0.560415	0.554367	0.589614	0.551193	0.576525	0.566051	0.501337	0.632708	0.559854	0.815749	0.602182		0.657172	0.8111	0.291432	0.249795	1.04925	1.06687	1.00485	0.750816	0.715853	1.00747	0.627564	0.655321	0.655714	0.609925	0.65709	0.708822	0.607793	0.67458	0.707854	0.870242	0.619519	0.647066	0.602553	0.879039	0.651102	0.63948	0.670297	0.805993	0.710935		1.12486		2.232	2.266	4.17	4.08
Eu	0.212673	0.216996	0.215203	0.226214	0.219632	0.210274	0.216689	0.183656	0.266267	0.196817	0.34671	0.19805		0.256387	0.372087	0.126282	0.120943	0.386208	0.381504	0.38832	0.30132	0.286937	0.378844	0.260513	0.271601	0.260512	0.267112	0.297977	0.288687	0.257099	0.287166	0.290994	0.345902	0.259242	0.260709	0.252147	0.334838	0.263162	0.25982	0.254823	0.34612	0.255514		0.440273		0.799	0.836	1.27	1.28
Gd	1.07325	1.05425	1.02293	1.03158	1.02878	1.03875	1.04289	0.846808	1.2995	1.07572	1.38511	1.08681		1.15485	1.68231	0.600162	0.525608	1.80061	1.76855	1.83099	1.3638	1.28443	1.73489	1.11828	1.22186	1.16954	1.07364	1.28212	1.48242	1.13299	1.17604	1.2722	1.48201	1.09595	1.14003	1.05863	1.46293	1.155	1.16242	1.17445	1.42737	1.36376		1.78998		3.131	3.123	4.6	4.7
Tb	0.231438	0.217104	0.216422	0.216872	0.219914	0.225923	0.222145	0.184896	0.259081	0.221708	0.27876	0.227504		0.229931	0.33651	0.137667	0.121082	0.36335	0.366776	0.366211	0.271249	0.275378	0.371153	0.231473	0.259673	0.236099	0.224147	0.26719	0.297698	0.22664	0.245039	0.267986	0.307093	0.220907	0.235457	0.211549	0.294923	0.241139	0.236301	0.22873	0.297227	0.289785		0.334788		0.5794	0.5863	0.738	0.714
Dy	1.74813	1.64863	1.61532	1.63113	1.58622	1.6297	1.62627	1.36634	1.90074	1.62831	1.97209	1.71696		1.67861	2.45959	1.00434	0.93703	2.61154	2.62074	2.60999	1.9491	1.98432	2.60912	1.70773	1.90958	1.67588	1.62637	1.97046	2.15208	1.65691	1.72191	1.94974	2.15472	1.6081	1.64884	1.52833	2.12806	1.74227	1.70516	1.65078	2.06404	2.19445		2.35087		3.896	3.868	4.5	4.44
Ho	0.421538	0.390738	0.393675	0.395135	0.39079	0.405142	0.388071	0.329664	0.467272	0.401082	0.448132	0.414061		0.384189	0.603647	0.242774	0.225381	0.609384	0.614549	0.62756	0.474429	0.488478	0.620344	0.404668	0.458711	0.397954	0.374528	0.469649	0.514834	0.381369	0.420424	0.457828	0.511181	0.381123	0.399807	0.370775	0.506616	0.403416	0.411114	0.388478	0.492063	0.518838		0.526377		0.857	0.863	0.9	0.9
Er	1.35504	1.26223	1.24058	1.24314	1.2275	1.24563	1.21169	1.01918	1.46219	1.25568	1.38339	1.27991		1.15387	1.89735	0.76669	0.68627	1.93978	1.90127	1.92627	1.46903	1.45841	1.89866	1.26126	1.38782	1.23182	1.18207	1.46533	1.59086	1.19098	1.25004	1.39576	1.61308	1.19849	1.20654	1.13261	1.57303	1.27619	1.28268	1.21179	1.54836	1.60874		1.60498		2.523	2.537	2.6	2.6
Tm	0.209487	0.19396	0.194503	0.192492	0.205677	0.200454	0.196737	0.16469	0.236897	0.20139	0.203309	0.207997		0.184443	0.294554	0.127249	0.110292	0.301009	0.308256	0.305759	0.22297	0.234426	0.304931	0.192607	0.220924	0.200732	0.181825	0.238076	0.233401	0.186239	0.203044	0.219755	0.254591	0.188382	0.19224	0.178322	0.24383	0.200598	0.202194	0.186678	0.243705	0.261552		0.245145		0.376	0.393	0.38	0.38
Yb	1.49673	1.4103	1.38799	1.39132	1.39809	1.38922	1.41003	1.16892	1.55653	1.34486	1.42405	1.36369		1.24065	1.91732	0.898355	0.799741	2.08667	2.12017	2.14745	1.54665	1.63432	2.13329	1.37892	1.59681	1.3751	1.31163	1.62884	1.52729	1.31419	1.38189	1.55359	1.77634	1.29567	1.36558	1.2513	1.6867	1.38042	1.36859	1.32734	1.67261	1.78405		1.64054		2.502	2.529	2.48	2.44
Lu	0.244673	0.235141	0.226616	0.221295	0.234301	0.231973	0.232943	0.189886	0.260118	0.227035	0.22719	0.210904		0.194817	0.336351	0.143471	0.134033	0.335251	0.344592	0.337268	0.248121	0.261191	0.337552	0.219197	0.265973	0.225629	0.210622	0.262898	0.252185	0.212883	0.227978	0.246311	0.274919	0.208404	0.219701	0.207212	0.274862	0.218952	0.216994	0.217031	0.276033	0.284465		0.259545		0.3884	0.3894	0.381	0.366
Hf	0.529409	0.552299	0.567669	0.543277	0.532673	0.557878	0.53025	0.417306	0.563973	0.522772	0.658424	0.493743		0.527067	0.505868	0.358808	0.363751	1.03658	1.01127	1.0348	0.739814	0.636073	1.02759	0.656944	0.632841	0.639131	0.626951	0.626564	0.398999	0.654281	0.641445	0.728441	0.88427	0.628395	0.650107	0.635357	0.874267	0.635026	0.657528	0.636517	0.704535	0.699393		0.706435		1.467	1.487	3	3
Ta	0.0247476	0.0263218	0.0258813	0.0267018	0.0243084	0.0256446	0.0251853	0.0234798	0.031553	0.0233384	0.0120855	0.0174984		0.0154376	0.01122	0.0204571	0.0217072	0.0328875	0.0410763	0.0351285	0.0239801	0.0236635	0.034766	0.0218218	0.0220568	0.0227988	0.021736	0.0231484	0.0189641	0.0201137	0.0258769	0.0236909	0.0327013	0.024484	0.0200421	0.0213681	0.0305489	0.0209127	0.0212123	0.0216389	0.0265022	0.0282775		0.0214058		0.0437	0.0396	0.15	0.15
Pb	1.70387	1.68507	1.69782	1.82586	1.66356	1.75496	1.79152	1.65281	0.521826	0.474418	0.919629	0.137886		0.555168	1.0586	1.33467	1.36573	1.96538	2.04864	2.00168	1.44173	1.36973	2.03435	1.38848	1.38095	1.34668	1.34841	1.45766	0.534096	1.39686	1.22802	1.43331	1.86222	1.31787	1.37463	1.33755	1.74718	1.26172	1.32039	1.4463	0.143567	0.118929		0.207891		5.4	5.25	5.36	5.04
Th	0.12537	0.128602	0.129208	0.127317	0.12679	0.127918	0.126789	0.11291	0.124072	0.111753	0.0670676	0.0990093		0.0573917	0.053252	0.094847	0.0977368	0.221458	0.218313	0.223888	0.145891	0.111211	0.215063	0.125502	0.105325	0.139061	0.132945	0.109298	0.0816718	0.139268	0.130635	0.154865	0.188155	0.126599	0.139642	0.131604	0.189018	0.130142	0.128262	0.132382	0.12585	0.114652		0.0921019		0.2525	0.2576	1.26	1.27
U	0.0923379	0.0938067	0.0933322	0.0978122	0.0918277	0.0927564	0.102979	0.0798673	0.0901315	0.0839447	0.0416166	0.0624932		0.0678611	0.0381423	0.193891	0.124426	0.143945	0.142945	0.140352	0.0917293	0.0831899	0.140474	0.0855783	0.0774244	0.0899415	0.0895341	0.0838862	0.239583	0.0868166	0.0849732	0.108207	0.126189	0.0869923	0.0900399	0.0865802	0.125922	0.0910843	0.0882024	0.0863774	0.0734448	0.0586864		0.0585933		0.1499	0.1528	0.465	0.468
V	210.852	229.684	230.654	231.121	211.065	223.731	217.923	221.01	280.512	260.097	292.848	260.461		237.788	251.749	292.682	275.827	285.338	265.828	292.591	287.284	355.944	285.537	273.721	312.635	282.377	276.153	342.651	259.666	269.942	263.395	282.294	319.378	273.444	258.379	237.555	318.342	254.399	264.878	253.788	287.024	277.984		329.604		567.8	572.4	375	372
Cr	491.496	475.6	474.362	549.834	488.15	561.236	495.618	635.729	570.346	717.578	382.956	145.366		726.59	712.197	1113.1	901.338	4.12161	3.12872	4.43365	19.8506	28.6613	4.4239	43.4961	35.355	20.1015	35.1497	27.4152	36.7684	31.7372	43.7657	17.7953	4.58361	41.3221	25.7056	29.1679	4.00488	41.7621	46.8351	33.6113	5.84876	29.0158		25.9012		25.51	26.65	61	58.1
Ni	153.555	127.489	131.835	124.116	143.946	139.123	131.552	260.907	178.542	291.627	84.4249	72.2091		215.735	248.21	301.464	295.753	7.7975	8.00489	8.44065	28.6055	28.8622	8.07286	36.5527	36.0801	28.1702	32.4189	28.2285	58.4264	30.7456	33.392	27.0987	13.9888	33.9111	30.1422	31.4376	14.3112	34.4938	36.1426	31.6445	14.3373	26.603		25.5195		12.53	14.77	35.7	36.2
Li	5.68154	5.29355	4.31524	8.33204	7.17747	7.51423	11.0222	10.4427	5.17636	5.66791	2.97481	4.5659		6.29084	11.3791	54.7579	55.395	4.63235	5.86537	3.16626	14.1242	6.51564	4.86877	8.05521	11.159	6.25534	15.807	9.05722	15.4277	24.4388	8.68477	20.2512	6.64341	10.3517	20.6154	21.6927	9.91265	11.9066	10.58	13.9251	1.43629	1.26701		1.36901		7.98	8.08	7.3	7.21
Be	0.232382	0.22155	0.237099	0.231161	0.21	0.225725	0.216939	0.171512	0.186127	0.184488	0.184045	0.181103		0.16553	0.186857	0.157822	0.148633	0.404813	0.384827	0.408861	0.284169	0.249489	0.379991	0.291622	0.216005	0.247662	0.283694	0.235935	0.14868	0.295917	0.271584	0.277371	0.332673	0.280743	0.270126	0.267411	0.363985	0.274139	0.260757	0.299743	0.288253	0.219818		0.215399		0.253	0.273	0.7	0.81
1JB-2 reference values (RV): Imai, 1995 and Jochum et al., 2016
2JB-3 reference values (RV): Imai, 1995 and Dulski, 2001
Unit: UV- upper volcanic unit, LV-lower volcanic unit, DC - dike complex
