# Supplementary material for: Boninite and boninite-series volcanics in northern Zambales ophiolite: doubly vergent subduction initiation along Philippine Sea plate margins
Source: Copernicus journal article supplement (doi:10.5194/se-9-713-2018), 2018-06-05
Supplement: Supplementary file 1 [file Supp Table 1 final_mineral chem.xlsx]

## Sheet: Table1a_oliv
Supplementary Table 1a Representative microprobe analyses of olivine in Zambales boninite
										Cations (based on 4.0 oxygens)
Sample	SiO2	FeO	MnO	MgO	CaO	NiO	Total	Mg#		Si	Fe	Mn	Mg	Ca	Ni	Total
ZM2-107-spot1-ol1	41.101	10.611	0.18	49.521	0.111	0.261	101.863	0.892697		0.993565	0.214514	0.00368555	1.78461	0.00287502	0.00507532	3.00667
ZM2-107-spot1-2	41.046	11.451	0.166	48.963	0.135	0.18	101.963	0.884021		0.994279	0.231973	0.0034059	1.76814	0.00350385	0.00350743	3.00544
ZM2-107-spot2-ol2	41.425	9.745	0.14	50.122	0.112	0.264	101.849	0.901659		0.996804	0.196104	0.00285339	1.79799	0.00288762	0.00511011	3.00271
ZM2-107-spot4-ol1	41.006	11.719	0.176	48.714	0.117	0.232	101.995	0.881095		0.994464	0.237678	0.00361527	1.76119	0.0030402	0.00452594	3.00532
ZM2-107-spot5-ol1A	41.307	9.473	0.143	50.508	0.112	0.305	101.9	0.904803		0.993081	0.19046	0.00291194	1.81022	0.00288505	0.00589848	3.00678
ZM2-107-spot5-ol1B	41.243	9.136	0.135	50.772	0.105	0.363	101.787	0.908313		0.991572	0.18369	0.00274912	1.81974	0.00270481	0.00702036	3.00811
ZM2-107-spot6-ol3	41.125	11.391	0.206	48.848	0.126	0.196	101.939	0.884319		0.996219	0.230763	0.00422671	1.76403	0.00327034	0.0038193	3.00334
ZM2-107-spot7-ol3	41.485	9.784	0.161	49.776	0.103	0.332	101.703	0.900686		0.999991	0.197232	0.00328713	1.78869	0.00266021	0.00643757	2.99981
ZM2-107-spot8-ol2	40.998	11.442	0.191	48.567	0.12	0.22	101.544	0.883267		0.997245	0.232754	0.00393513	1.76113	0.00312748	0.00430468	3.00267
ZM2-107-spot8-ol3	40.902	11.178	0.147	48.51	0.112	0.206	101.083	0.885534		0.998052	0.228102	0.00303817	1.76462	0.0029282	0.00404348	3.00156
ZM2-100A spot5 ol1	40.582	8.613	0.118	51.378	0.156	0.413	101.35	0.914043		0.97982	0.17391	0.00241313	1.84927	0.00403563	0.00802124	3.01999
ZM2-100A spot5 ol1	40.251	11.241	0.141	49.607	0.166	0.27	101.79	0.88722		0.978616	0.228558	0.00290363	1.798	0.00432432	0.00528054	3.02034
ZM2-100A spot6 ol1	40.789	8.717	0.144	50.609	0.151	0.345	100.83	0.911891		0.988994	0.176756	0.00295732	1.82932	0.00392285	0.00672897	3.01035
ZM2-100A spot6 ol1	39.324	10.63	0.149	49.787	0.167	0.299	100.395	0.893039		0.968825	0.219017	0.00310928	1.82858	0.00440837	0.00592568	3.03118
ZM2-100A spot6 ol1	40.68	10.559	0.146	50.074	0.161	0.304	101.975	0.894222		0.98353	0.213494	0.00298982	1.8048	0.00417068	0.00591234	3.01638
ZM2-100A spot6 ol2	40.826	10.277	0.139	50.966	0.167	0.334	102.81	0.898379		0.978298	0.205948	0.00282121	1.82065	0.00428771	0.00643813	3.02114
ZM2-100A spot6 ol4	40.693	10.665	0.176	49.378	0.171	0.316	101.434	0.891932		0.98922	0.216815	0.00362386	1.78944	0.00445393	0.0061793	3.01041

## Sheet: Table1b_pyr
Supplementary Table 1b Representative microprobe analyses of pyroxene in Zambales boninite
																			Cations (based on 6.0 oxygens)
Sample	Comment	SiO2	TiO2	Al2O3	Cr2O3	FeO*	MnO	MgO	CaO	Na2O	K2O	NiO	Total	Mg#	Wo	En	Fs		Si	Ti	Al(4)	Al(6)	Cr	Fe	Mn	Mg	Ca	Na	Ni	Total
B-7-11-spot1-opx2	opx microphenocryt	57.076	0.045	1.052	0.344	8.645	0.197	31.292	1.792	0.015	0	0.059	100.517	0.865833	3.44096	83.6025	12.9566		1.98508	0.00117723		0.0431215	0.00945924	0.251446	0.00580331	1.62244	0.0667784	0.00101148	0.00165065	3.98796
B-7-11-spot2-opx4	opx microphenocryt	57.113	0.049	1.337	0.707	7.972	0.222	31.62	1.718	0.015	0.005	0.049	100.807	0.876108	3.30794	84.7113	11.9808		1.97631	0.00127539		0.0545263	0.0193425	0.230698	0.00650668	1.63115	0.0636968	0.00100637	0.00136394	3.98609
B-7-11-spot4-opx	opx microphenocryt	57.144	0.016	1.27	0.513	8.478	0.19	31.35	1.88	0.034	0.005	0.041	100.921	0.868295	3.60728	83.6958	12.6969		1.97918	0.000416831		0.0518409	0.0140477	0.245563	0.00557383	1.61868	0.0697663	0.00228316	0.00114229	3.98871
B-7-11-spot6-opx2	opx microphenocryt	57.527	0.029	0.645	0.404	8.491	0.201	31.953	1.564	0	0	0.075	100.889	0.870286	2.97056	84.4418	12.5876		1.99103	0.00075497		0.0263099	0.011055	0.245765	0.00589233	1.64865	0.0579984	0	0.00208807	3.98954
B-7-11-spot8-opx2	opx microphenocryt	56.988	0.048	1.323	0.63	8.184	0.213	31.902	1.567	0.01	0	0.067	100.932	0.874211	2.99375	84.8024	12.2038		1.97122	0.00124888		0.0539345	0.0172293	0.236741	0.00624048	1.64506	0.0580758	0.000670651	0.00186426	3.99228
B-7-11-spot9-opxB	opx microphenocryt	57.466	0.025	0.743	0.256	8.71	0.218	31.516	1.69	0.001	0.003	0.065	100.693	0.865792	3.22895	83.782	12.989		1.99414	0.000652546		0.0303871	0.00702358	0.252766	0.00640748	1.63037	0.0628356	6.72805e-05	0.00181442	3.9866
B-7-11-spot9-opxC	opx microphenocryt	56.914	0.003	0.444	0.105	9.64	0.274	30.187	2.502	0.024	0	0.022	100.115	0.848093	4.80898	80.7291	14.4619		1.9998	7.92892e-05		0.0183867	0.00291695	0.283269	0.00815461	1.58124	0.094195	0.00163502	0.000621825	3.99029
B-7-11-spot10-opx1	opx microphenocryt	56.448	0.044	1.621	0.815	7.595	0.206	32.035	1.548	0.02	0.01	0.091	100.433	0.882629	2.97413	85.6365	11.3894		1.9596	0.00114894		0.066322	0.0223692	0.220498	0.00605721	1.65789	0.0575791	0.00134615	0.00254121	3.9958
B-7-11-spot11-opx3	opx microphenocryt	57.238	0.044	0.925	0.598	7.94	0.191	32.486	1.42	0	0	0.08	100.922	0.879439	2.6885	85.578	11.7335		1.97709	0.0011432		0.0376564	0.0163312	0.229361	0.00558807	1.67282	0.0525539	0	0.00222286	3.99477
B-5-7 spot2 opx2 core	opx microphenocryt	56.336	0.024	0.992	0.45	8.032	0.181	32.178	2.301	0.015	0	0.059	100.568	0.877189	4.31369	83.9336	11.7528		1.96107	0.000628411		0.040698	0.0123849	0.233823	0.00533668	1.66985	0.0858217	0.00101238	0.0016521	4.01227
B-5-7 spot4 opx2 core	opx microphenocryt	56.493	0.038	1.058	0.654	7.48	0.185	32.991	2.006	0.018	0	0.058	100.981	0.887178	3.73229	85.4052	10.8625		1.95369	0.000988484		0.0431221	0.0178818	0.216331	0.00541898	1.70085	0.0743301	0.00120692	0.00161349	4.01543
B-5-7 spot5 opx4 core	opx microphenocryt	56.132	0.019	1.494	0.926	7.258	0.169	32.814	1.793	0.029	0.003	0.066	100.703	0.889631	3.37572	85.9586	10.6656		1.94489	0.000495183		0.0610086	0.0253671	0.210309	0.00495973	1.69494	0.0665641	0.00194817	0.00183954	4.01246
B-5-7 spot6 opx1 core	opx microphenocryt	56.274	0.017	1.296	0.548	8.391	0.232	31.851	1.968	0.04	0.004	0.073	100.694	0.871259	3.72487	83.8791	12.3961		1.95827	0.000444979		0.0531526	0.0150771	0.244194	0.00683815	1.65234	0.0733776	0.00269879	0.00204346	4.00861
B-5-7 spot6 opx2 core	opx microphenocryt	56.344	0.027	1.251	0.757	7.495	0.178	32.585	2.072	0.034	0	0.066	100.809	0.88573	3.89035	85.1258	10.9839		1.95255	0.000703793		0.0510937	0.0207408	0.217211	0.0052247	1.68338	0.0769341	0.00228443	0.00183983	4.01197
B-5-7 spot7 opx1 core	opx microphenocryt	55.735	0.018	1.258	0.501	8.498	0.195	31.637	2.491	0.014	0	0.068	100.415	0.869066	4.68737	82.8314	12.4812		1.95005	0.000473714		0.0518744	0.0138589	0.248651	0.00577881	1.65015	0.0933825	0.000949708	0.00191384	4.01708
B-5-7 spot7 opx7 core	opx microphenocryt	56.125	0.038	1.438	0.678	8.268	0.203	32.015	1.99	0.029	0.005	0.074	100.863	0.873475	3.75555	84.0656	12.1788		1.95003	0.000993103		0.0588841	0.0186246	0.240238	0.00597402	1.65825	0.0740818	0.00195356	0.00206821	4.01131
B-5-7 spot9 opx2 core	opx microphenocryt	55.539	0.048	1.321	0.56	8.51	0.197	31.689	2.582	0	0	0.08	100.526	0.869092	4.84287	82.6988	12.4583		1.943	0.00126311		0.0544668	0.0154894	0.248977	0.00583749	1.6527	0.0967841	0	0.00225135	4.02076
ZM2-100A spot1 opx1 core	opx microphenocryt	56.112	0.022	0.865	0.421	8.609	0.233	32.413	2.013	0.031	0.002	0.057	100.778	0.870341	3.73947	83.778	12.4825		1.9547	0.000576466		0.0355137	0.0115953	0.250804	0.00687491	1.68327	0.0751351	0.00209378	0.00159727	4.02226
ZM2-100A spot1 opx2 core	opx microphenocryt	56.522	0.029	1.227	0.47	8.041	0.166	32.057	2.246	0.027	0.014	0.067	100.866	0.876662	4.22773	83.9584	11.8138		1.9607	0.000756691		0.0501642	0.0128904	0.233271	0.0048774	1.65778	0.0834792	0.00181594	0.0018696	4.00823
ZM2-100A spot1 opx3 core	opx microphenocryt	55.633	0.038	1.088	0.339	9.403	0.223	31.508	2.124	0	0.003	0.05	100.409	0.856613	3.98479	82.2462	13.769		1.95215	0.00100297		0.0449949	0.00940489	0.275932	0.00662782	1.64821	0.0798562	0	0.00141133	4.01972
ZM2-100A spot2 opx1	opx microphenocryt	56.311	0.035	1	0.49	8.252	0.235	32.304	2.053	0	0.008	0.081	100.769	0.874677	3.84163	84.1061	12.0523		1.95806	0.000915433		0.0409814	0.0134711	0.239965	0.00692128	1.67456	0.0764884	0	0.00226567	4.01398
ZM2-100A spot4 opx1	opx microphenocryt	55.76	0.021	1.3	0.691	8.291	0.237	32.062	2.322	0	0.004	0.101	100.789	0.87333	4.34802	83.5343	12.1177		1.94317	0.000550469		0.0533932	0.0190388	0.24163	0.00699555	1.66567	0.0867009	0	0.00283131	4.02015
ZM2-100A spot6 opx1	opx microphenocryt	56.049	0.034	1.175	0.61	8.398	0.193	31.338	2.549	0.014	0.001	0.048	100.409	0.869332	4.83619	82.7274	12.4364		1.95932	0.00089401		0.0484094	0.0168594	0.24551	0.00571453	1.63312	0.0954732	0.000948877	0.00134976	4.00765
ZM2-100A spot7 opx1	opx microphenocryt	56.314	0	1.161	0.444	8.461	0.212	32.222	2.07	0.014	0.013	0.072	100.983	0.871626	3.86866	83.789	12.3423		1.9554	0		0.0475122	0.0121892	0.245695	0.00623505	1.66794	0.0770128	0.00094252	0.00201108	4.01551
ZM2-100A spot7 opx2	opx microphenocryt	55.223	0.046	1.476	0.599	8.851	0.239	31.111	2.591	0.046	0	0.076	100.258	0.862387	4.90846	82.0041	13.0874		1.94105	0.00121619		0.0611445	0.0166463	0.260175	0.00711541	1.6302	0.0975793	0.00313486	0.00214886	4.02041
ZM2-100A spot9 opx1	opx microphenocryt	56.527	0.025	0.865	0.461	8.366	0.216	32.396	1.959	0.003	0	0.062	100.88	0.87348	3.65732	84.1519	12.1907		1.96282	0.000652965		0.0353993	0.0126561	0.242939	0.00635277	1.67697	0.072884	0.000201971	0.00173179	4.0126
ZM2-100A spot9 opx3	opx microphenocryt	55.599	0.011	0.949	0.588	8.114	0.192	31.93	1.999	0.009	0.002	0.06	99.453	0.875249	3.78894	84.2071	12.004		1.95842	0.000291446		0.0393967	0.0163753	0.239018	0.00572831	1.67667	0.0754442	0.000614647	0.00170008	4.01375
B-5-7 spot2 opx1 core3	zoned opx core	54.232	0.118	1.304	0.053	17.805	0.396	25.562	1.754	0.029	0.011	0.029	101.293	0.719071	3.42461	69.4418	27.1336		1.95689	0.00320272		0.0554554	0.00151203	0.537291	0.012103	1.37504	0.0678133	0.00202887	0.00084176	4.01269
B-5-7 spot2 opx1 rim1	zoned opx rim	56.103	0.049	1.569	0.55	8.554	0.201	31.524	2.011	0.029	0.004	0.049	100.643	0.867907	3.82688	83.4678	12.7053		1.95425	0.00128385		0.0644126	0.0151471	0.249183	0.00593028	1.63699	0.075055	0.00195855	0.00137299	4.00576
B-5-7 spot2 opx1 rim4	zoned opx rim	56.632	0.025	0.673	0.189	9.047	0.272	32.053	2.273	0.011	0.003	0.054	101.232	0.863325	4.21456	82.6924	13.0931		1.96654	0.00065299		0.0275429	0.00518891	0.262725	0.0080001	1.65928	0.0845695	0.000740589	0.00150839	4.01688
B-5-7 spot4 opx3 core	spongy opx core	53.28	0.202	1.223	0	19.981	0.39	24.186	1.632	0.032	0.001	0.014	100.941	0.683352	3.20759	66.1404	30.652		1.9503	0.00556178		0.0527616	0	0.61166	0.0120917	1.31981	0.0640075	0.00227107	0.000412234	4.01892
B-5-7 spot4 opx3 rim	spongy opx rim	56.542	0.04	1.186	0.512	8.178	0.197	32.634	2.112	0.001	0.009	0.083	101.494	0.876764	3.91828	84.2395	11.8422		1.95152	0.00103845		0.0482437	0.0139716	0.23605	0.00575908	1.67912	0.0781032	6.69183e-05	0.0023044	4.01657
B-5-7 spot7 opx5 rim	zoned spongy opx rim	56.832	0.025	0.355	0.145	9.702	0.303	31.061	2.713	0.02	0.003	0.081	101.24	0.850922	5.07073	80.7757	14.1536		1.98056	0.000655331		0.0145807	0.00399518	0.282756	0.00894383	1.61369	0.101302	0.00135135	0.00227069	4.01024
B-5-7 spot8 opx4 core	zoned opx core	54.921	0.066	1.542	0.092	14.904	0.326	27.936	1.509	0.01	0	0.027	101.333	0.769682	2.90129	74.7327	22.366		1.95204	0.0017645		0.0645936	0.00258531	0.443006	0.00981418	1.48022	0.0574664	0.00068912	0.000771957	4.01295
B-5-7 spot8 opx4 rim	zoned opx rim	56.518	0.02	1.182	0.373	8.769	0.217	32.3	2.006	0.008	0.009	0.05	101.452	0.867849	3.72919	83.547	12.7238		1.95485	0.000520334		0.0481835	0.0102002	0.253649	0.00635729	1.66548	0.0743415	0.000536489	0.00139115	4.01591
B-5-7 spot8 opx4 rim	zoned opx rim	56.441	0.034	1.229	0.406	8.905	0.227	32.11	2.025	0.008	0	0.043	101.428	0.865388	3.77428	83.271	12.9547		1.95402	0.000885399		0.0501465	0.0111131	0.257825	0.0066565	1.65724	0.0751161	0.000536993	0.00119752	4.01473
B-5-7 spot8 opx4 rim	zoned opx rim	56.101	0.03	1.089	0.408	8.517	0.235	32.214	2.025	0.029	0.013	0.057	100.718	0.870858	3.78544	83.7877	12.4269		1.95413	0.000786015		0.044706	0.0112361	0.2481	0.00693325	1.67278	0.0755757	0.00195851	0.00159712	4.01838
ZM2-100A spot3 opx1 core1	zoned opx core	56.469	0.035	0.634	0.161	9.519	0.275	32.002	1.951	0.045	0.005	0.08	101.176	0.857018	3.61916	82.5984	13.7824		1.96522	0.00091621		0.0260043	0.00442997	0.277044	0.00810624	1.66031	0.0727499	0.00303639	0.0022396	4.02028
ZM2-100A spot3 opx1 rim2	zoned opx rim	56.895	0.007	0.692	0.261	9.113	0.227	32.001	2.179	0.038	0.013	0.06	101.486	0.862273	4.04889	82.7344	13.2167		1.97004	0.000182316		0.0282398	0.0071452	0.263887	0.00665751	1.65186	0.080841	0.0025511	0.00167121	4.01365
ZM2-100A spot3 opx1 rim3	zoned opx rim	56.912	0.012	0.868	0.298	8.719	0.178	32.177	2.086	0.009	0	0.091	101.35	0.868067	3.88732	83.4307	12.682		1.96862	0.000312223		0.035386	0.00814981	0.25222	0.00521511	1.65926	0.0773118	0.000603593	0.00253208	4.0096
ZM2-100A spot3 opx1 rim4	zoned opx rim	56.61	0.033	0.854	0.377	8.703	0.209	32.205	2.071	0.003	0.006	0.068	101.139	0.868377	3.85854	83.4855	12.656		1.96367	0.000861023		0.034913	0.0103393	0.252464	0.00614054	1.66536	0.0769713	0.000201762	0.00189741	4.01308
B-7-11-sp2-cpx4rim2	augite rim	54.669	0.141	3.005	0.127	7.984	0.213	22.757	9.604	0.086	0	0.032	98.618	0.835575	20.2193	66.6612	13.1195		1.97367	0.00382893	0.127859		0.00362502	0.241051	0.00651326	1.22478	0.3715	0.00601971	0.000929312	3.95977
B-5-7 spot1 opx1 aug rim	augite rim	50.601	0.356	6.075	0	8.377	0.185	15.809	18.896	0.13	0.012	0.049	100.49	0.770886	39.8392	46.3756	13.7852		1.85548	0.00981915	0.262542		0	0.256887	0.00574587	0.864197	0.742406	0.00924241	0.00144535	4.00833
B-5-7 spot2 opx2 aug rim	augite rim	49.319	0.341	6.903	0	9.272	0.201	15.221	18.586	0.111	0.003	0.018	99.975	0.745339	39.5438	45.0588	15.3975		1.82654	0.00949939	0.301306		0	0.287174	0.00630518	0.840367	0.737522	0.00797044	0.000536249	4.01736
B-5-7 spot3 opx2 aug rim	augite rim	52.198	0.287	4.535	0.082	7.655	0.175	18.108	17.751	0.105	0	0.034	100.93	0.808334	36.2851	51.5016	12.2133		1.89082	0.00781998	0.193611		0.00234847	0.231899	0.00536935	0.977864	0.688961	0.00737447	0.00099073	4.00706
B-5-7 spot4 opx1 aug rim	augite rim	52.17	0.233	4.002	0.037	7.79	0.201	19.128	16.853	0.097	0.003	0.048	100.562	0.81405	34.0138	53.7146	12.2716		1.89478	0.00636531	0.171305		0.00106246	0.236609	0.00618328	1.03566	0.655826	0.00683051	0.00140235	4.01616
B-5-7 spot5 opx1 aug rim	augite rim	49.505	0.353	6.807	0	9.304	0.192	14.614	19.469	0.131	0	0.018	100.393	0.73687	41.3666	43.2036	15.4298		1.83006	0.00981562	0.29657		0	0.287636	0.00601179	0.805372	0.771142	0.00938928	0.000535264	4.01653
B-5-7 spot5 opx4 aug rim	augite rim	49.681	0.347	6.373	0	8.754	0.215	15.032	19.879	0.15	0	0.029	100.46	0.753785	41.7391	43.9147	14.3463		1.83403	0.00963542	0.277277		0	0.270258	0.00672264	0.827261	0.786292	0.0107362	0.000861176	4.02307
B-5-7 spot6 opx4 aug rim	augite rim	51.496	0.266	4.585	0.017	8.36	0.223	18.048	17.666	0.135	0	0.019	100.815	0.793771	35.8317	50.9334	13.2349		1.87624	0.00728993	0.196884		0.000489709	0.254729	0.00688187	0.980291	0.689648	0.0095366	0.000556862	4.02255
B-5-7 spot7 opx7 aug rim	augite rim	48.499	0.52	8.15	0.005	9.4	0.208	13.881	19.758	0.185	0	0.026	100.632	0.724729	42.574	41.6166	15.8093		1.79299	0.0144603	0.355106		0.000146147	0.290623	0.00651322	0.765029	0.782642	0.0132606	0.000773212	4.02155
B-5-7 spot8 opx1 aug rim	augite rim	49.324	0.374	6.276	0	9.706	0.245	15.469	18.311	0.134	0	0.026	99.865	0.739683	38.6227	45.3981	15.9792		1.83291	0.010454	0.274866		0	0.301634	0.00771144	0.856951	0.72907	0.00965455	0.000777205	4.02403
B-5-7 spot9 opx1 aug rim	augite rim	51.86	0.208	3.973	0	7.373	0.164	17.354	19.112	0.153	0	0.028	100.225	0.807559	38.994	49.2646	11.7414		1.8987	0.00572813	0.171434		0	0.225748	0.00508573	0.947182	0.749727	0.0108607	0.000824632	4.01529
B-5-7 spot9 opx4 aug rim	augite rim	47.251	0.424	9.593	0	11.363	0.246	12.832	18.934	0.151	0.003	0.012	100.809	0.668145	41.4699	39.1048	19.4253		1.75671	0.0118572	0.420338		0	0.353296	0.00774659	0.711205	0.754234	0.0108846	0.00035888	4.02677
ZM2-100A spot4 3 rim	augite rim	53.451	0.123	2.532	0.132	7.795	0.226	20.531	15.674	0.108	0.012	0.034	100.618	0.824434	31.1459	56.7643	12.0898		1.9323	0.00334465	0.107879		0.00377283	0.235663	0.00692013	1.10647	0.607119	0.00756986	0.000988729	4.01259

## Sheet: Table1c_sp 
Supplementary Table 1c Representative microprobe analyses of spinel in Zambales boninite
																		Cations (based on 4.0 oxygens)
Sample	SiO2	TiO2	Al2O3	Cr2O3	Fe2O3	FeO	MnO	MgO	CaO	Na2O	NiO	Total	Cr#	Cr'	Al'	Fe3+'		Si	Ti	Al	Cr	Fe3+	Fe2+	Mn	Mg	Ca	Na	Ni	Total
B-7-11-spot1-spl2	0.06	0.138	10.303	58.42	5.16675	12.3389	0.276	13.772	0.01	0	0.121	100.606	0.791834	74.2354	19.5158	6.24879		0.00192233	0.0033257	0.389041	1.47983	0.124566	0.330606	0.00748984	0.657786	0.000343282	0	0.00311847	2.99803
B-7-11-spot1-spl8	0.106	0.154	12.982	54.63	5.68831	12.6906	0.234	13.764	0.041	0.015	0.117	100.422	0.738428	68.8075	24.3735	6.81894		0.00336279	0.00367486	0.48539	1.37025	0.135795	0.336693	0.00628777	0.650953	0.00139365	0.000922635	0.00298579	2.99771
B-7-11-spot2-spl1	0.092	0.131	9.47	57.918	4.41629	16.0872	0.312	11.024	0.013	0	0.071	99.5425	0.804033	75.9704	18.5163	5.51338		0.00304074	0.00325678	0.368889	1.51349	0.109838	0.444659	0.00873437	0.543176	0.000460371	0	0.00188768	2.99776
B-7-11-spot2-spl2	0.083	0.121	11.403	57.41	4.50849	13.1352	0.243	13.332	0.034	0	0.105	100.384	0.771559	72.949	21.5985	5.45245		0.0026587	0.00291543	0.430491	1.45396	0.108674	0.351872	0.006593	0.636644	0.00116693	0	0.00270557	2.99805
B-7-11-spot4-sp4	0.071	0.109	11.082	57.158	5.10374	14.1126	0.283	12.734	0.004	0	0.114	100.772	0.775789	72.7805	21.0343	6.18522		0.00227991	0.00263276	0.419403	1.45114	0.123325	0.378986	0.00769717	0.609585	0.000137624	0	0.00294471	2.99817
B-7-11-spot4-sp6	0.092	0.1	10.457	57.745	4.2792	14.7275	0.283	12.09	0.018	0	0.097	99.8937	0.78744	74.6007	20.1376	5.26163		0.00299641	0.00244985	0.401398	1.48697	0.104877	0.401144	0.00780703	0.587017	0.000628145	0	0.00254135	2.99804
B-7-11-spot7-sp1	0.862	0.213	12.508	51.081	7.52565	15.1934	0.259	11.698	0.392	0.008	0.115	99.866	0.732597	66.4351	24.2493	9.31562		0.027779	0.00516316	0.475065	1.3015	0.182499	0.409468	0.00706961	0.561995	0.0135354	0.000499855	0.00298117	2.988
B-7-11-spot8-sp4	0.099	0.09	14.291	51.823	5.78592	15.6298	0.277	11.871	0.084	0	0.094	100.045	0.708684	65.9053	27.0915	7.00324		0.00317419	0.00217054	0.540027	1.3137	0.139597	0.41909	0.00752253	0.567409	0.0028857	0	0.0024244	2.998
B-7-11-spot8-sp7	0.096	0.147	11.175	55.627	5.7613	15.6199	0.298	11.675	0.055	0	0.084	100.538	0.769552	71.5292	21.4199	7.05094		0.00310959	0.00358158	0.426613	1.42459	0.140429	0.423124	0.00817587	0.563766	0.00190884	0	0.00218872	2.99749
B-7-11-spot9-sp3	0.218	0.248	14.602	48.813	8.28091	15.4308	0.282	11.968	0.127	0	0.103	100.085	0.691605	62.2133	27.7416	10.0451		0.00697201	0.00596595	0.550388	1.23427	0.19929	0.412711	0.00763901	0.570603	0.00435191	0	0.00264983	2.99533
B-7-11-spot11-sp1	0.079	0.205	12.778	52.078	7.11435	15.2705	0.275	11.827	0.192	0	0.087	99.9058	0.7322	66.8553	24.4521	8.69253		0.00255336	0.00498385	0.486746	1.3308	0.173032	0.412756	0.00752842	0.569863	0.00664906	0	0.00226195	2.99717
B-7-11-spot11-sp3	0.15	0.209	13.869	50.942	7.82798	13.6613	0.259	13.036	0.209	0	0.12	100.292	0.711325	64.4297	26.1473	9.42299		0.00476996	0.00499915	0.519785	1.28078	0.187318	0.363306	0.00697605	0.617986	0.00712105	0	0.00306962	2.99647
ZM2-107-spot1-spl4	0.061	0.183	13.566	52.041	7.23307	15.3236	0.269	12.256	0	0.007	0.075	101.015	0.720161	65.7522	25.5499	8.69794		0.00194201	0.00438227	0.509012	1.30991	0.173281	0.407981	0.00725371	0.581676	0	0.00043208	0.00192071	2.99779
ZM2-107-spot2-sp1	0.057	0.149	11.925	55.714	5.70395	11.9805	0.251	14.057	0	0	0.118	99.9555	0.758118	70.5967	22.5243	6.879		0.00182088	0.00358029	0.448972	1.40716	0.137116	0.320065	0.0067915	0.669436	0	0	0.00303226	2.99797
ZM2-107-spot2-sp3	0.047	0.107	11.598	55.923	5.57523	13.9904	0.288	12.785	0	0	0.124	100.438	0.763856	71.2234	22.0185	6.7581		0.00151033	0.00258632	0.439249	1.42081	0.134816	0.375974	0.00783883	0.612469	0	0	0.00320534	2.99846
ZM2-107-spot4-sp4	0.057	0.195	13.313	52.116	7.4474	14.5138	0.31	12.668	0	0	0.082	100.702	0.724227	65.9287	25.1045	8.96679		0.00181663	0.00467469	0.50006	1.31322	0.178608	0.386837	0.00836834	0.601881	0	0	0.00210225	2.99757
ZM2-107-spot5-sp2	0.045	0.15	11.771	55.527	5.60091	14.6843	0.321	12.38	0.005	0	0.07	100.557	0.759881	70.8216	22.3793	6.79907		0.00144729	0.00362877	0.44618	1.41195	0.135552	0.394958	0.00874447	0.593572	0.0001723	0	0.001811	2.99814
ZM2-107-spot7-sp2	0.047	0.143	12.455	53.622	6.86961	14.4667	0.286	12.592	0	0	0.092	100.583	0.742811	68.1121	23.5829	8.30504		0.0015056	0.00344567	0.470229	1.35809	0.165596	0.387558	0.00776003	0.601335	0	0	0.00237071	2.9983
ZM2-107-spot8-sp1	0.084	0.223	13.66	51.601	7.18118	14.5233	0.278	12.521	0.136	0	0.094	100.308	0.717048	65.4852	25.8409	8.67382		0.00268314	0.00535791	0.514245	1.30316	0.17261	0.38796	0.00752134	0.59623	0.00465454	0	0.0024153	2.99708
ZM2-107-spot9-sp1	0.033	0.15	12.96	55.515	5.61718	12.4056	0.242	14.132	0	0	0.144	101.204	0.741845	69.238	24.0942	6.66779		0.00103816	0.00354952	0.480521	1.38082	0.132977	0.326383	0.00644843	0.662776	0	0	0.00364413	2.99835
ZM2-107-spot9-sp2	0.045	0.096	11.61	56.444	5.12786	14.5739	0.305	12.481	0	0	0.112	100.795	0.765339	71.7836	22.0096	6.20687		0.00144428	0.00231759	0.439163	1.43229	0.123846	0.391175	0.00829134	0.597171	0	0	0.00289158	2.99859
ZM2-107-spot10-sp1	0.149	0.112	7.582	60.752	4.2495	15.4683	0.354	11.314	0.027	0	0.085	100.093	0.843145	79.8333	14.8518	5.31485		0.00492907	0.00278691	0.295609	1.58896	0.105785	0.427934	0.00991901	0.557964	0.000957011	0	0.00226192	2.99711
ZM2-107-spot10-sp3	0.062	0.124	11.615	56.126	5.23165	15.2295	0.305	12.088	0.004	0	0.073	100.858	0.764245	71.5719	22.0785	6.3496		0.00199373	0.00299932	0.440199	1.42696	0.126596	0.40956	0.00830732	0.579482	0.000137819	0	0.00188833	2.99813
B-5-7 spot1 sp in opx	0.087	0.181	13.465	50.984	7.4847	15.7542	0.282	11.58	0.21	0	0.132	100.167	0.717524	65.2143	25.6737	9.11198		0.00280248	0.00438559	0.511192	1.29847	0.181428	0.424401	0.00769411	0.556087	0.00724797	0	0.00342039	2.99741
B-5-7 spot3 sp in opx	0.098	0.17	12.949	52.665	7.3821	14.1135	0.268	12.725	0.181	0.019	0.114	100.699	0.731791	66.6702	24.4353	8.89444		0.00312482	0.00407732	0.48662	1.32769	0.177127	0.37635	0.00723803	0.604878	0.00618375	0.00117462	0.00292404	2.99795
B-5-7 spot3 sp in opx	0.107	0.198	14.357	50.705	8.02505	13.575	0.239	13.24	0.182	0.03	0.132	100.79	0.7032	63.5847	26.8372	9.57808		0.00337785	0.00470163	0.534165	1.26556	0.190638	0.358388	0.00639059	0.623097	0.00615605	0.00183621	0.00335204	2.99766
B-5-7 spot4 sp in opx	0.103	0.152	12.089	54.165	6.659	13.7152	0.246	12.869	0.183	0.005	0.095	100.285	0.75036	68.9797	22.9491	8.07125		0.00330387	0.00366738	0.457016	1.37366	0.160731	0.367912	0.00668355	0.615377	0.00628943	0.000310957	0.00245125	2.99756
B-5-7 spot4 sp in opx	0.054	0.095	10.812	57.32	5.33719	15.4856	0.288	11.903	0.058	0	0.125	101.478	0.780535	73.0037	20.5266	6.46965		0.00173537	0.0022964	0.409504	1.45639	0.129067	0.416179	0.00783928	0.570249	0.0019971	0	0.00323137	2.99849
B-5-7 spot5 sp in opx	0.052	0.122	11.638	56.049	5.37071	13.5404	0.237	12.971	0.14	0	0.12	100.24	0.763641	71.3921	22.097	6.51093		0.00167064	0.00294827	0.44067	1.42371	0.129843	0.363805	0.00644934	0.621248	0.00481929	0	0.00310128	2.99827
B-5-7 spot6 sp in ol	0.072	0.108	9.961	59.076	4.8383	11.7045	0.276	14.077	0.004	0	0.135	100.252	0.799142	75.2281	18.9079	5.86395		0.00231216	0.00260877	0.377002	1.49993	0.116919	0.314336	0.00750725	0.673917	0.000137632	0	0.00348737	2.99815
B-5-7 spot6 sp in ol	0.061	0.141	11.84	57.045	5.30102	11.2101	0.256	14.651	0.004	0.029	0.135	100.676	0.763714	71.5392	22.1335	6.32725		0.0019292	0.00335423	0.441321	1.42639	0.126157	0.296493	0.00685762	0.690758	0.000135544	0.00177824	0.00343448	2.99873
B-5-7 spot8 sp in ol	0.064	0.057	9.121	59.663	4.91566	14.6119	0.301	12.25	0.033	0.005	0.097	101.122	0.814411	76.5522	17.4449	6.00293		0.00207286	0.00138865	0.348167	1.52781	0.119806	0.395778	0.00825739	0.591476	0.00114519	0.000313982	0.00252721	2.99887
B-5-7 spot9 sp in ol	0.08	0.146	10.231	57.887	5.12781	12.663	0.261	13.43	0.007	0	0.121	99.9538	0.791479	74.1968	19.5477	6.25554		0.00258393	0.00354707	0.389461	1.47824	0.124632	0.342045	0.00714032	0.646663	0.00024225	0	0.0031438	2.9977
ZM2-100A spot2 sp	0.057	0.134	10.581	57.844	5.78156	11.7877	0.267	14.111	0.062	0.012	0.172	100.815	0.785748	73.11	19.9351	6.95493		0.00181691	0.00321285	0.397503	1.45778	0.138679	0.314228	0.00720869	0.670544	0.00211751	0.000741625	0.00441028	2.99848
ZM2-100A spot5 sp	0.115	0.148	11.121	55.269	5.5746	15.4739	0.296	11.476	0.198	0.009	0.104	99.7845	0.769266	71.6364	21.4866	6.87694		0.00375341	0.00363342	0.427786	1.42621	0.136914	0.422362	0.00818287	0.558379	0.00692416	0.000569527	0.00273049	2.99744
ZM2-100A spot6 sp2	0.082	0.18	11.172	54.554	6.44818	15.1639	0.285	11.754	0.129	0	0.119	99.8911	0.766128	70.5337	21.5315	7.9348		0.00267006	0.00440866	0.428739	1.40446	0.157998	0.412928	0.00786029	0.570564	0.00450061	0	0.00311698	2.99741
ZM2-100A spot7 sp1	0.113	0.182	12.893	52.001	7.17404	15.2398	0.293	11.964	0.051	0	0.117	100.029	0.730148	66.6271	24.6244	8.74847		0.00364402	0.00441469	0.490017	1.32583	0.174089	0.410995	0.00800306	0.575161	0.00176217	0	0.00303506	2.99699
ZM2-100A spot7 sp2	0.114	0.165	13.034	52.387	6.98546	14.5044	0.267	12.371	0.213	0.002	0.133	100.176	0.729462	66.7652	24.7615	8.47326		0.00365775	0.00398216	0.49288	1.32894	0.168659	0.389194	0.00725615	0.591731	0.00732255	0.000124418	0.00343273	2.99718
ZM2-100A spot9 sp1	0.132	0.184	13.705	50.54	7.5789	15.7835	0.265	11.518	0.257	0.034	0.132	100.129	0.71214	64.6436	26.1301	9.22626		0.00424879	0.00445487	0.519906	1.28617	0.18357	0.424863	0.00722475	0.552686	0.00886335	0.00212185	0.00341778	2.99753
