# Supplementary figures and images for: Boninite and boninite-series volcanics in northern Zambales ophiolite: doubly vergent subduction initiation along Philippine Sea plate margins
Source: Copernicus journal article supplement (doi:10.5194/se-9-713-2018), 2018-06-05

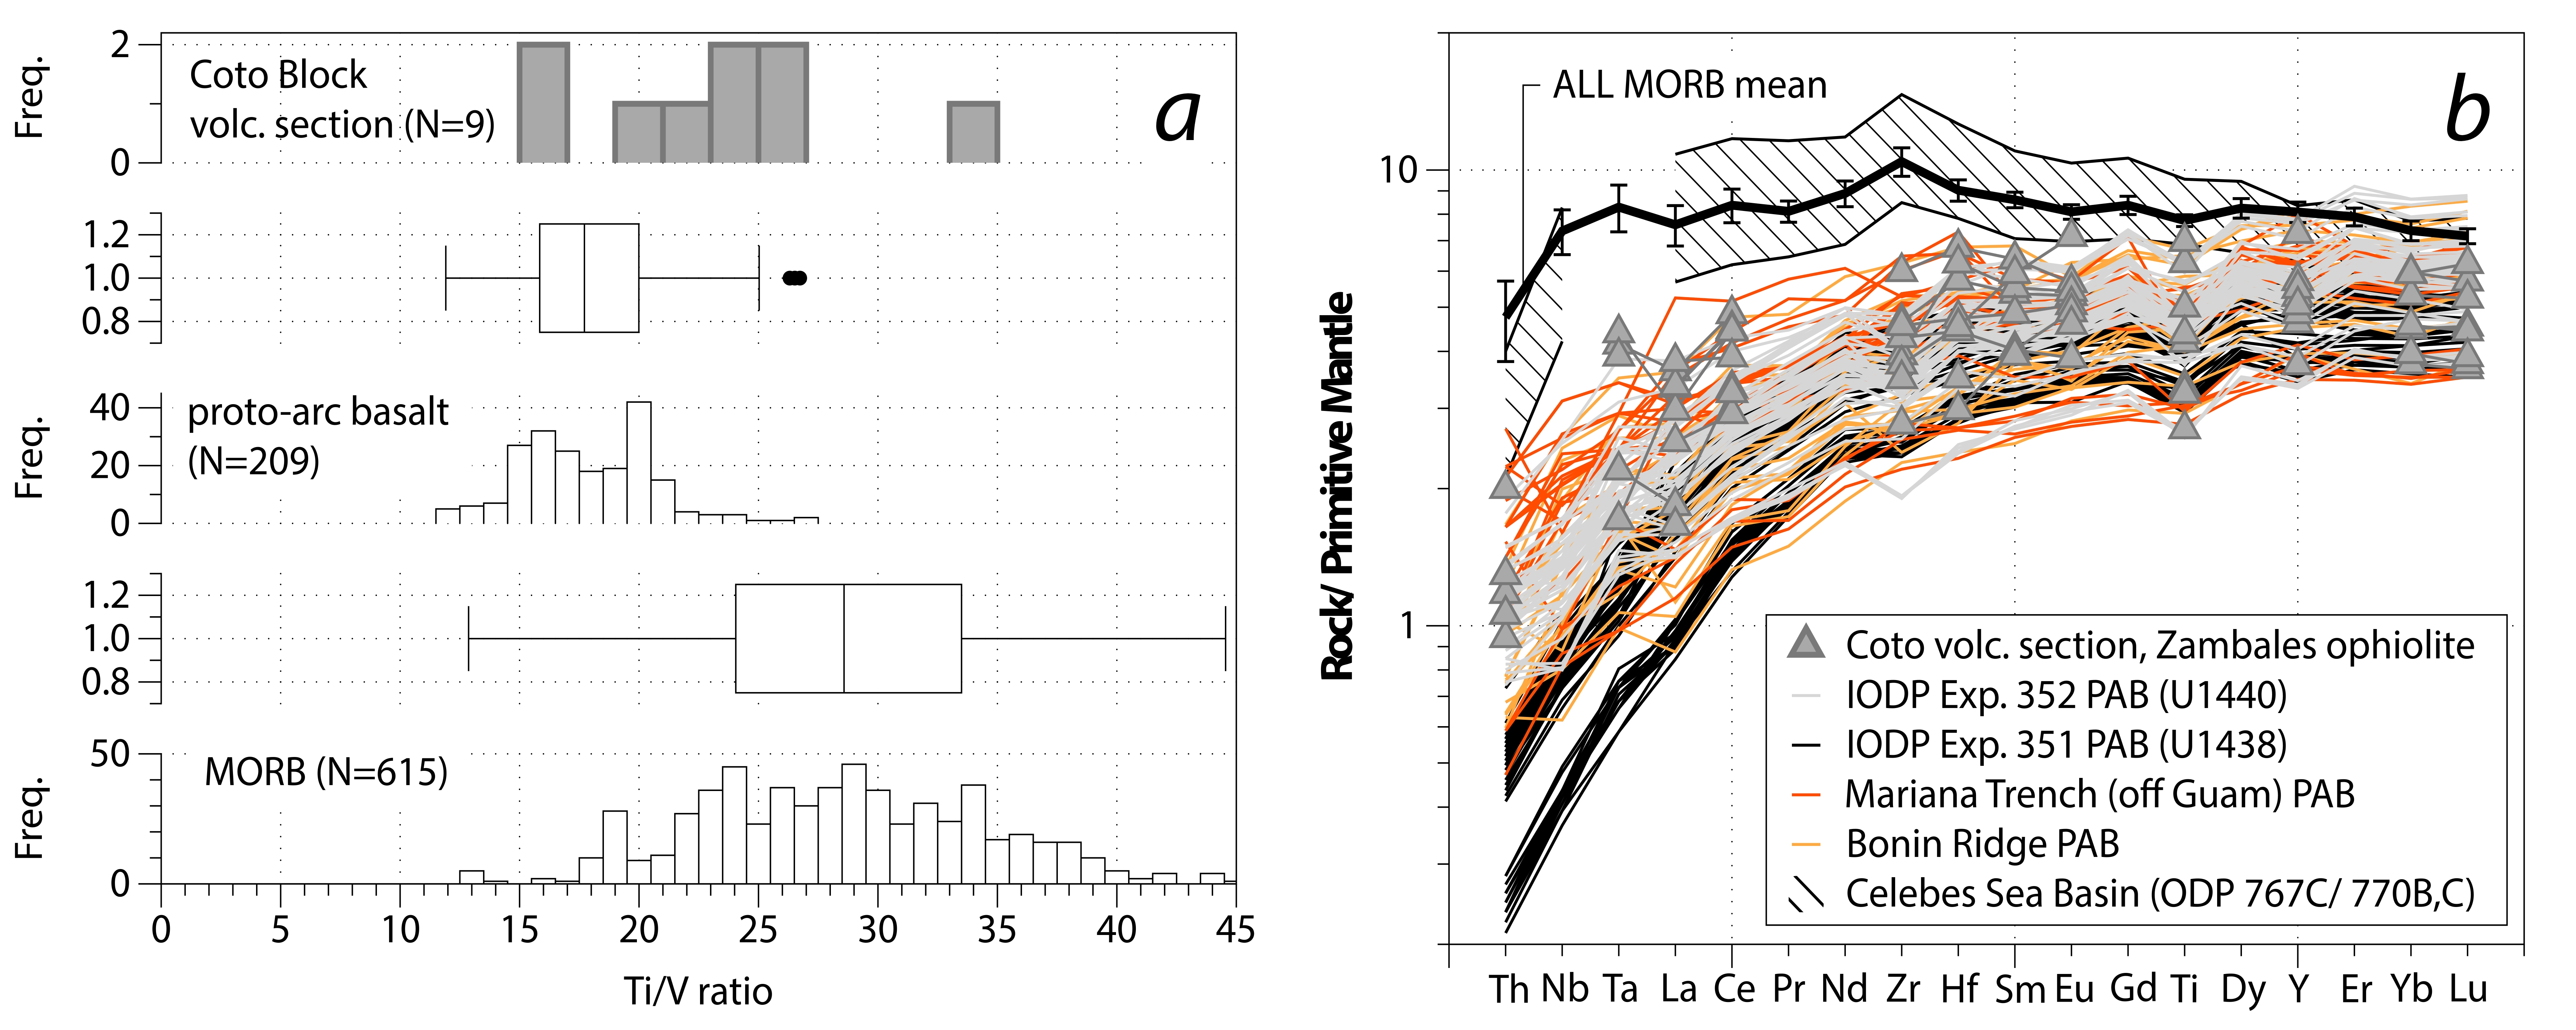

Supplement: Supplementary file 1 [file se-9-713-2018-supplement.zip › SuppFig2.jpg]

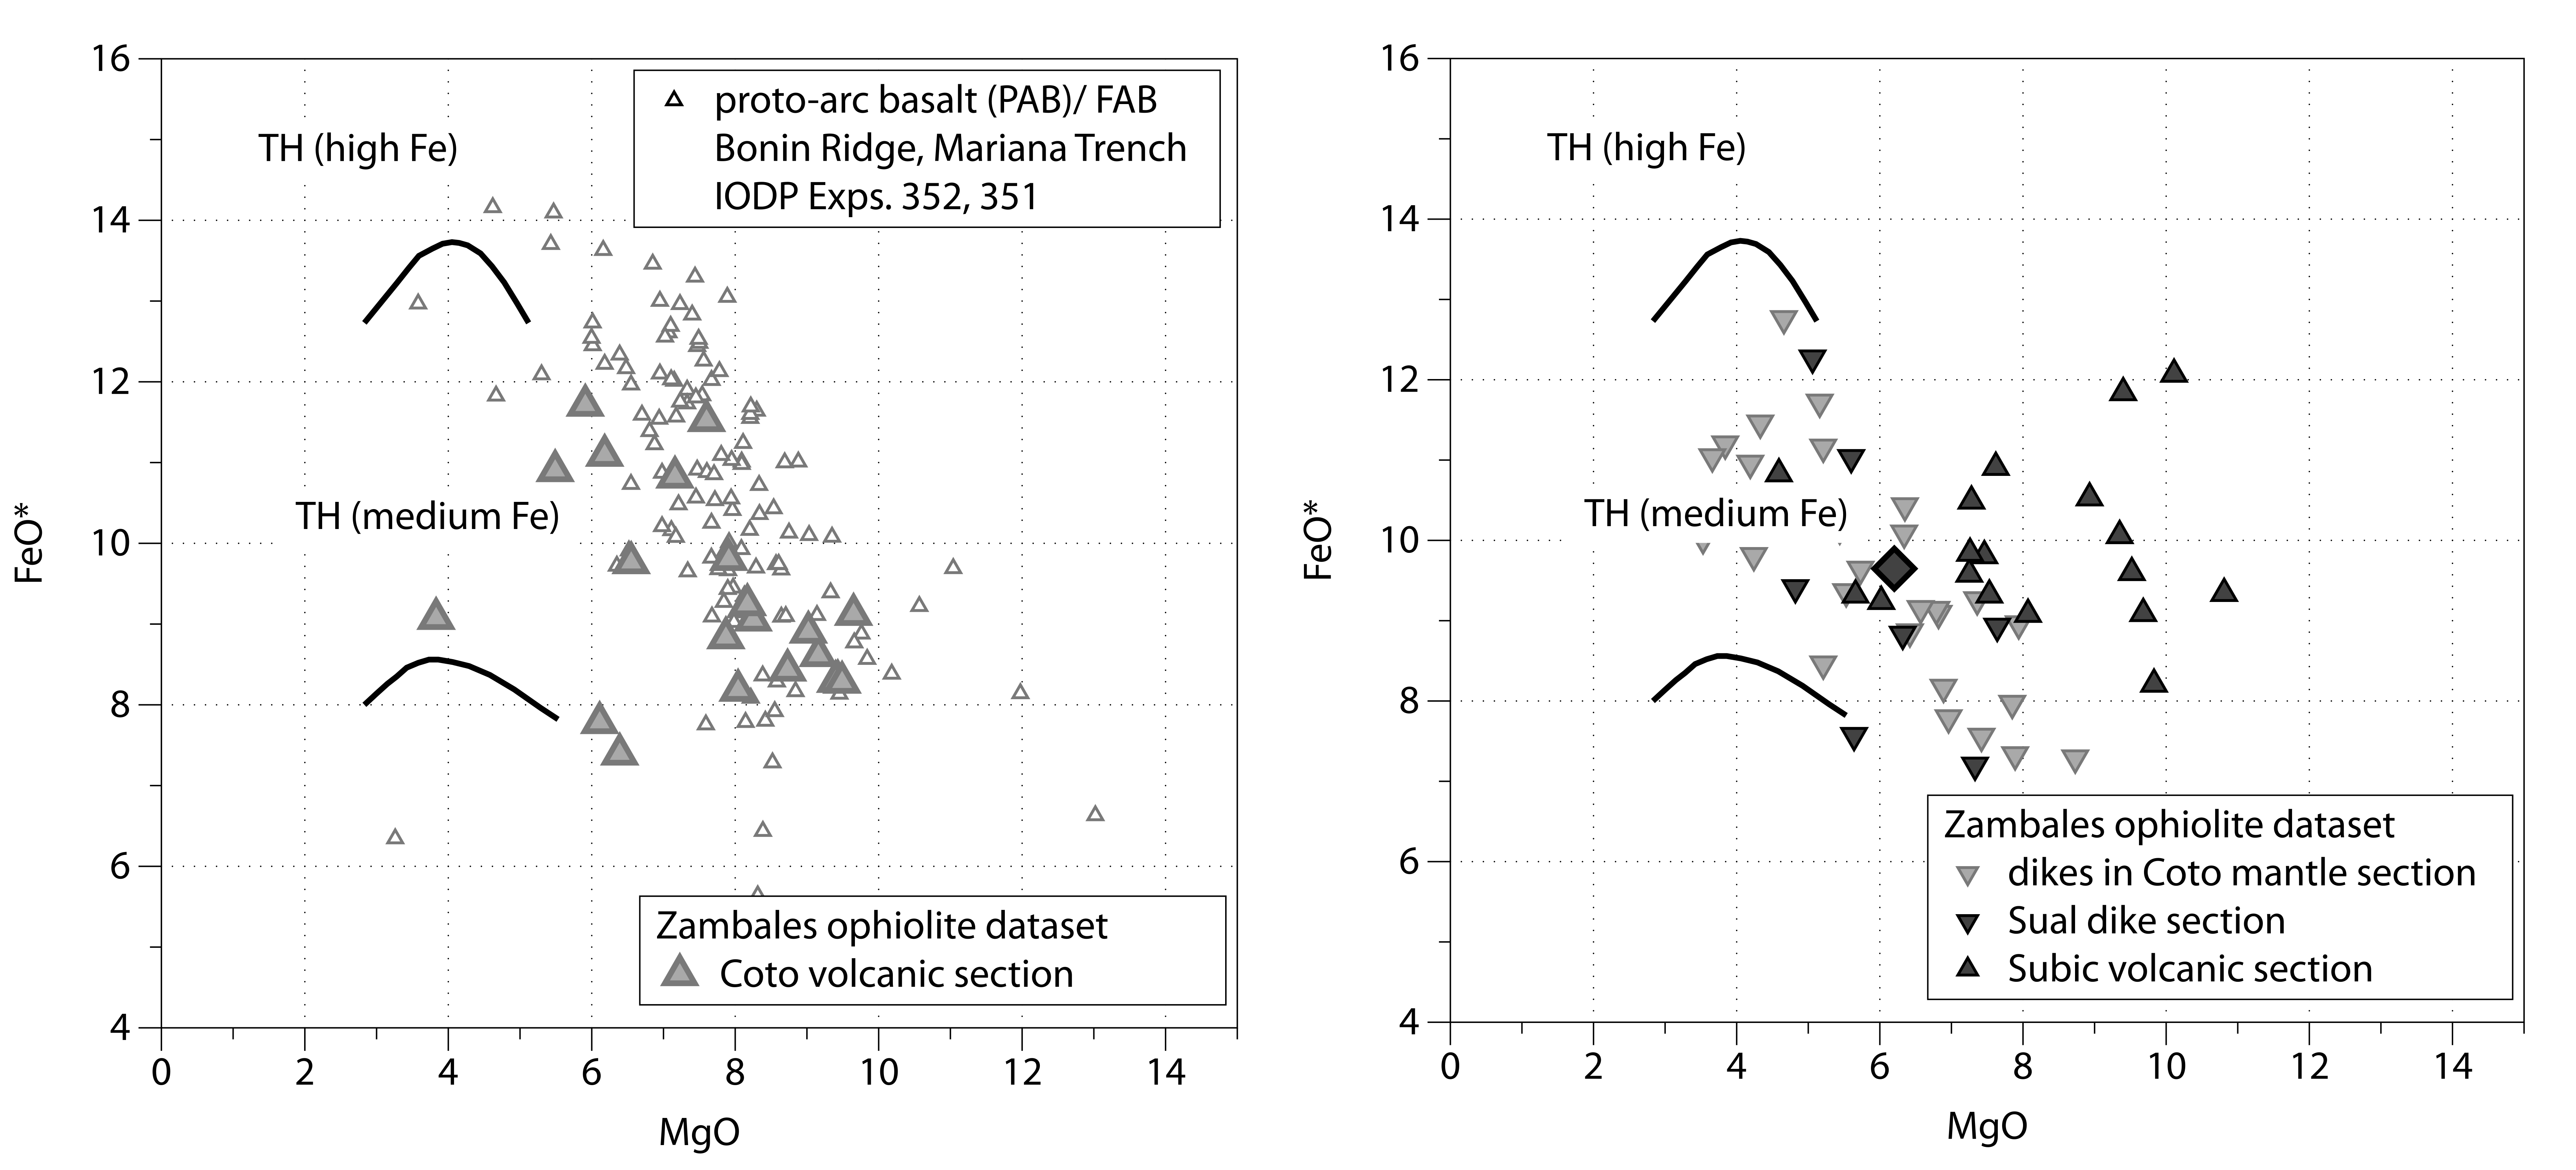

Supplement: Supplementary file 1 [file se-9-713-2018-supplement.zip › SuppFig1.png]
